# Supplementary material
Source: publisher site journal article supplement (https://www.dovepress.com/article/supplementary_file/604270/604270%20Supplementary%20Materials.docx)
Supplement: Supplementary file 1 [file 604270%20Supplementary%20Materials.docx]

**Supplementary Material**

**Twelve Tips for Implementing Competency-Based Medical Education (CBME)**

*in Resource-Limited Educational Settings*

Manuscript ID: 604270

Journal of Advances in Medical Education | Dovepress

**Contents**

**Section 1:** Sample Competency-to-Session Mapping Matrix *[Tip 3]*

**Section 2:** Sample EPA Card and Entrustment Scale *[Tip 5]*

**Section 3:** Simplified Mini-CEX Template and Feedback Prompts *[Tip 6]*

**Section 4:** Sample 6–12 Month CBME Implementation Timeline *[Tip 11]*

**Supplementary Section 1: Sample Competency-to-Session Mapping Matrix**

**Supplementary File 1**

Table S1 provides a sample competency-to-session mapping matrix illustrating how core CBME competencies and Entrustable Professional Activities (EPAs) can be mapped against existing teaching sessions and clinical rotations. The coverage level coding system is explained below the table. This matrix is designed to be adapted using a free spreadsheet tool such as Google Sheets (see Table 2 of the main manuscript).

**Table S1a: Coverage Level Key**

| **Code** | **Level** | **Meaning** |
| --- | --- | --- |
| 0 | Not covered | Competency not addressed in this session/rotation |
| I | Introduced | Concept introduced; no expectation of performance |
| P | Practiced | Learner has supervised opportunity to practise |
| M | Mastered | Learner expected to perform independently by end of session |
| A | Assessed | Formal assessment of this competency conducted here |

**Table S1b. Sample Competency-to-Session Mapping Matrix**

Note: Columns represent major teaching sessions or clinical rotations in a sample undergraduate medical curriculum. Cells show coverage level (I/P/M/A/0). Gaps (0) indicate areas requiring curricular attention. Adapt by replacing column headers with your institution's actual sessions.

| **Competency / EPA** | **Intro Medicine (Yr 1)** | **Clinical Skills Lab (Yr 2)** | **Internal Med Rotation** | **Primary Care Rotation** | **OSCE / Assessment** | **GAP Notes** |
| --- | --- | --- | --- | --- | --- | --- |
| **DOMAIN 1: MEDICAL EXPERT** | | | | | | |
| EPA 1: Manage acute presentations of common infectious diseases | I | I | P/M | P | A |  |
| EPA 2: Take a focused clinical history | I | P | M | M | A |  |
| EPA 3: Perform targeted physical examination | 0 | I/P | P/M | M | A |  |
| EPA 4: Formulate a differential diagnosis | I | 0 | P | P/M | A | Gap: no Year 2 coverage |
| EPA 5: Interpret basic investigations (CBC, CXR, ECG) | I | I | P/M | P | A |  |
| **DOMAIN 2: COMMUNICATOR** | | | | | | |
| EPA 6: Counsel patients on diagnosis and management | I | 0 | P | M | A | Gap: no Year 2 practice |
| EPA 7: Communicate with families during difficult conversations | 0 | I | P | P | 0 | Gap: not formally assessed |
| EPA 8: Write clinical notes and discharge summaries | 0 | I | P/M | M | A |  |
| **DOMAIN 3: PROFESSIONAL & HEALTH ADVOCATE** | | | | | | |
| EPA 9: Demonstrate ethical decision-making | I | 0 | P | P | 0 | Gap: not formally assessed |
| EPA 10: Identify and address social determinants of health | I | 0 | 0 | P | 0 | Gap: limited integration |
| EPA 11: Hand over patients safely (SBAR) | 0 | I | P/M | P | A |  |

**Instructions for use:** (1) List your institution's core competencies or EPAs in the first column. (2) Replace column headers with actual teaching sessions/rotations. (3) For each cell, assign a coverage code (I/P/M/A/0). (4) Cells showing '0' across multiple columns represent curricular gaps requiring attention. (5) Share the completed matrix with faculty in a mapping workshop to validate and prioritize gaps. (6) This matrix can be maintained in Google Sheets and updated annually.

**Supplementary Section 2: Sample EPA Card and Entrustment Scale**

**Supplementary File 2**

Table S2 presents a sample EPA card adapted for a resource-limited educational setting, followed by the 5-level entrustment scale used for assessment. The EPA and scale are designed for paper-based implementation and require no digital infrastructure. Institutions should adapt the clinical scenario to locally prevalent conditions.

**Table S2a. Sample EPA Card — Adapted for Resource-Limited Settings**

| **EPA Title** | Manage acute presentations of common infectious diseases in primary care and district hospital settings |
| --- | --- |
| **EPA Description** | The learner independently assesses patients presenting with common infectious diseases in primary care or district hospital settings, formulates a diagnosis, initiates appropriate management, and arranges follow-up or referral when indicated. Common conditions include malaria, tuberculosis (TB), acute respiratory infections, gastroenteritis, and typhoid fever. |
| **Clinical Context** | Primary care clinic, outpatient department, or general medical ward in a resource-limited setting |
| **Target Learner Level** | Final-year medical student or early post-graduate trainee (Year 1 internship) |
| **Expected Entry Level** | Entrustment Level 2 (requires proximal supervision) |
| **Expected Exit Level** | Entrustment Level 4 (able to act independently; could supervise junior learners) |
| **Assessment Methods** | Direct Observation (mini-CEX); Case-Based Discussion (CBD); Logbook entry; Supervisor rating using entrustment scale |
| **Enabling Competencies** | Clinical reasoning and diagnosis; Patient communication and counselling; Resource-appropriate prescribing; Infection prevention and control; Professionalism and patient safety; Appropriate referral decision-making |
| **Key Observable Behaviours** | • Takes a focused, systematic history relevant to infectious presentations  • Performs appropriate targeted physical examination  • Orders and interprets basic investigations available in the local context (e.g., malaria RDT, sputum microscopy, CBC)  • Formulates a prioritised differential diagnosis  • Initiates evidence-based treatment appropriate to local formulary and resources  • Provides clear patient/family counselling on diagnosis, treatment, and warning signs  • Identifies when referral to higher-level care is indicated  • Completes accurate clinical documentation |
| **Red Flags (Unsatisfactory)** | Fails to identify clinical emergency; Prescribes inappropriately without recognising drug resistance patterns; Unable to counsel patient; Does not document assessment |
| **Suggested Assessment Frequency** | Minimum 3 observed encounters per rotation; at least 1 formal mini-CEX per rotation period |
| **Notes for Supervisor** | Adapt the clinical scenario to locally prevalent infectious disease presentations. Focus feedback on the transition from 'knows' to 'does' — observable clinical performance, not knowledge recall. |

**Table S2b. 5-Level Entrustment Scale (adapted from ten Cate et al., 2024)**

Supervisors assign an entrustment level after each observed clinical encounter. The level reflects the degree of independence demonstrated — not the trainee's effort or attitude.

| **Level** | **Label** | **Description** | **Supervisor Action** |
| --- | --- | --- | --- |
| 1 | Observe only | Trainee may observe but may not perform any part of this activity without direct co-performance by supervisor. Knowledge base incomplete for safe practice. | Supervisor performs; trainee assists or observes |
| 2 | Act with proactive supervision | Trainee may attempt this activity but supervisor must be physically present in the room and actively guiding throughout. Significant errors expected without continuous oversight. | Supervisor present and verbally guiding throughout |
| 3 | Act with reactive supervision | Trainee may perform activity with supervisor immediately available (in the building) but not physically present. Supervisor called if needed. Minor errors may occur. | Supervisor available nearby; checks in at key decision points |
| 4 | Act independently | Trainee reliably and safely performs this activity without requiring supervision. Minor variation is self-corrected. Supervisor available for complex cases by phone. | Supervisor available by phone; reviews documentation |
| 5 | Supervise others | Trainee not only performs independently but can teach, supervise, and assess junior learners performing this activity. Demonstrates deep understanding and professional role modelling. | Trainee assumes supervisory role for this EPA |

**Reference:** ten Cate O, Schultz K, Bhatt M, et al. Entrustable Professional Activities and Entrustment Decision-Making in Health Professions Education. London: Ubiquity Press; 2024. DOI: 10.5334/bdc (open access, freely downloadable at ubiquitypress.com).

**Instructions for paper-based use:** Print this table on a single A4 sheet and laminate for repeated use in clinical settings. Supervisor circles the appropriate level after each observation, adds brief written feedback, and signs. Trainee keeps a log of entrustment levels across encounters in their paper-based portfolio.

**Supplementary Section 3: Simplified Mini-CEX Template and Structured Feedback Prompts**

**Supplementary File 3**

The Mini-Clinical Evaluation Exercise (mini-CEX) is a validated direct observation assessment tool widely used in CBME assessment. Table S3a presents a simplified mini-CEX template adapted for paper-based implementation in resource-limited settings, requiring no digital infrastructure. Table S3b provides structured feedback prompts based on the Pendleton model (Ramani & Krackov, 2012), suitable for faculty with limited prior feedback training.

**Table S3a. Simplified Mini-CEX Assessment Form — Resource-Limited Settings Adaptation**

Instructions: Complete one form per observed clinical encounter. Tick the appropriate rating for each domain. Allow 15–25 minutes per encounter including 5–10 minutes of structured feedback. Completed forms are retained in the learner's portfolio.

| **SECTION A: ENCOUNTER DETAILS** | |
| --- | --- |
| Learner Name |  |
| Year of Training |  |
| Date of Observation |  |
| Clinical Setting | □ Outpatient □ Ward □ Emergency □ Primary Care □ Other: ___ |
| Patient Complaint (brief) |  |
| Duration of Encounter | minutes |
| Supervisor Name and Signature |  |
| **SECTION B: COMPETENCY RATINGS** | |
| **Domain** | **Rating (circle one) 1 = Unsatisfactory | 3 = Satisfactory | 5 = Excellent | N/A** |
| 1. History Taking | 1 2 3 4 5 N/A |
| 2. Physical Examination | 1 2 3 4 5 N/A |
| 3. Clinical Reasoning / Differential Diagnosis | 1 2 3 4 5 N/A |
| 4. Investigations — Ordering and Interpretation | 1 2 3 4 5 N/A |
| 5. Management Plan (context-appropriate) | 1 2 3 4 5 N/A |
| 6. Patient Communication and Counselling | 1 2 3 4 5 N/A |
| 7. Professionalism and Patient Safety | 1 2 3 4 5 N/A |
| 8. Clinical Documentation | 1 2 3 4 5 N/A |
| **SECTION C: STRUCTURED FEEDBACK (use prompts in Table S3b)** | |
| What did the learner do well? (Strengths) |  |
| What could be improved? (Development area) |  |
| Agreed action before next encounter |  |
| Suggested entrustment level for this EPA (circle) | 1 2 3 4 5 |
| Learner signature (acknowledges feedback received) |  |

**Table S3b. Structured Feedback Prompts — Pendleton Model Adapted for CBME**

The Pendleton feedback model is a structured, bidirectional feedback framework suitable for faculty with limited formal feedback training. It requires no tools — only a brief structured conversation. The model has been adapted here for CBME contexts in resource-limited settings.

| **Step** | **Phase** | **Supervisor Prompt** | **Purpose** |
| --- | --- | --- | --- |
| 1 | Learner self-assessment (strengths) | "Before I give you my feedback, what do you think went particularly well in that encounter?" | Activates learner reflection; identifies self-awareness level; shifts power dynamic toward dialogue |
| 2 | Supervisor confirms strengths | "I agree — and I also noticed that you... [add 1–2 specific observed strengths with behavioural examples]." | Reinforces good performance with specific, observable evidence; prevents learner discounting of positive feedback |
| 3 | Learner self-assessment (development) | "What do you think could have gone better or differently?" | Allows the learner to identify their own gaps before the supervisor's input; reduces defensiveness |
| 4 | Supervisor adds development points | "I'd add that... [1–2 specific, observable areas for development]. For example, when you... I noticed that..." | Provides specific, actionable feedback on areas not self-identified; focuses on behaviours, not personality |
| 5 | Agree action plan | "So what's one specific thing you'll focus on before our next observation? How will you practise that?" | Creates commitment to a concrete, achievable learning action; closes the feedback loop |

**Key principles for feedback in resource-limited settings:** (1) Feedback should be given immediately after the encounter while details are fresh. (2) Focus on observable behaviours, not personality or ability. (3) Be specific — "You asked about drug allergies before prescribing" is more useful than "Good history." (4) One or two key development points per session is sufficient — do not overwhelm the learner. (5) End on an agreed action, not a summary of weaknesses.

**Reference:** Ramani S, Krackov SK. Twelve tips for giving feedback effectively in the clinical environment. Med Teach. 2012;34(10):787-791. DOI: 10.3109/0142159X.2012.684916. [Free full text via PubMed Central: pmc.ncbi.nlm.nih.gov/articles/PMC3310283]

**Supplementary Section 4: Free Digital Resource-Sharing Tools for Peer Learning in Resource-Limited SettingsSupplementary File 4**

**Table S4: Comparative Overview of Free Resource-Sharing Tools for CBME Peer Learning Networks**

| Tool | Pros | Cons |
| --- | --- | --- |
| Google Drive | Free, offline-capable, collaborative editing, familiar | Requires Google account; data stored on Google servers |
| Dropbox | Simple interface, file versioning | Limited free storage (2 GB); requires internet |
| WhatsApp | Widely used in LMICs, low bandwidth, no account needed beyond phone | No version history for files; limited to 100MB per file; privacy concerns |
| Telegram | Large group channels, supports bots and polls, low bandwidth | Less universal than WhatsApp |

**Supplementary Section 5: Sample 6–12 Month CBME Implementation Timeline with Milestones**

**Supplementary File 5**

Table S4 presents a sample phased implementation timeline for CBME rollout in a resource-limited educational setting. The timeline is organized across five phases covering a 12-month period. It is designed for a single pilot department or year of training and should be adapted to institutional context, resource availability, and regulatory requirements. Milestones and success indicators are provided for each phase to support monitoring and evaluation.

**Table S5. Sample 12-Month Phased CBME Implementation Timeline**

Abbreviations: EPA = Entrustable Professional Activity; WBA = Workplace-Based Assessment; mini-CEX = Mini-Clinical Evaluation Exercise; CBD = Case-Based Discussion; KPI = Key Performance Indicator.

| **Phase** | **Timing** | **Key Activities** | **Milestones / Success Indicators** | **Responsible Lead** |
| --- | --- | --- | --- | --- |
| **PHASE 1: READINESS ASSESSMENT AND GOVERNANCE SETUP** | | | | |
| Phase 1 | Months 1–2 | • Conduct institutional readiness assessment using WHO UHC framework • Map existing curriculum to identify competency gaps (use matrix in Section 1) • Form CBME Steering Committee (include faculty, learner rep, admin) • Identify and appoint CBME champion per department • Conduct stakeholder orientation sessions • Define pilot scope: 1 department, 1 cohort, 5 core EPAs | ✓ Readiness assessment report completed ✓ CBME Steering Committee constituted with ToR ✓ Champion identified per pilot department ✓ Competency map drafted and validated ✓ Pilot EPAs selected (max 5) ✓ Stakeholder orientation attendance ≥70% faculty | CBME Committee Chair + Dept. Head |
| **PHASE 2: FACULTY DEVELOPMENT AND TOOL PREPARATION** | | | | |
| Phase 2 | Months 3–4 | • Conduct faculty development workshop: CBME principles, EPA assessment, feedback skills (use Pendleton model in Section 3) • Finalise and print EPA cards (adapt from Section 2) • Print mini-CEX forms (Section 3) and logbooks • Pilot test assessment tools with 2–3 volunteer supervisors • Brief learners on CBME approach and their role • Set up shared folder (Google Drive) for resources | ✓ Faculty workshop conducted; ≥75% pilot faculty attend ✓ EPA cards printed and distributed ✓ mini-CEX forms printed (50 copies minimum per supervisor) ✓ Learner orientation session completed ✓ Google Drive resource folder active ✓ Pilot test feedback incorporated into tools | Assessment Champion + Faculty Developer |
| **PHASE 3: PILOT IMPLEMENTATION** | | | | |
| Phase 3 | Months 5–8 | • Launch CBME pilot in selected department/cohort  • Supervisors conduct minimum 3 mini-CEX observations per learner per rotation  • Learners maintain paper-based portfolios/logbooks  • Assessment champions conduct monthly check-in sessions  • Champions collect completed forms and compile summary data • Mid-pilot check: review completion rates and barriers at Month 6  • Learners share resources via WhatsApp/Telegram group | ✓ ≥80% pilot supervisors conducting regular WBAs by Month 6 ✓ Learner portfolio completion rate ≥75% ✓ Monthly champion check-ins documented ✓ Mid-pilot review meeting held; barriers documented ✓ Learner satisfaction survey administered (Month 7) ✓ Average ≥3 mini-CEX observations per learner per rotation | Assessment Champions + Pilot Dept. Lead |
| **PHASE 4: EVALUATION AND REFINEMENT** | | | | |
| Phase 4 | Months 9–10 | • Conduct pilot evaluation: faculty and learner focus groups/surveys  • Analyse entrustment data: patterns, gaps, unexpected findings  • Review portfolios: completion quality and coverage gaps  • Document lessons learned; prepare evaluation report  • Present findings to institutional CBME Committee  • Refine EPA cards, mini-CEX forms, and assessment processes based on findings  • Identify early adopters for scale-up phase | ✓ Evaluation report completed and presented to Committee ✓ Focus groups/surveys completed (≥80% response rate) ✓ Entrustment data analysed; report produced ✓ Refined tools version 2.0 finalised ✓ Lessons learned document shared with stakeholders ✓ Scale-up candidates identified | CBME Committee + External Evaluator (if available) |
| **PHASE 5: SCALE-UP PLANNING AND DISSEMINATION** | | | | |
| Phase 5 | Months 11–12 | • Develop institutional scale-up plan: identify next 2–3 departments  • Present pilot findings at faculty/institutional meeting  • Train next cohort of department champions  • Submit pilot findings for publication or regional conference presentation  • Align CBME framework with national accreditation/licensure requirements (Tip 12)  • Explore external partnerships for ongoing support (FAIMER, WHO, NGOs)  • Draft institutional CBME policy document | ✓ Scale-up plan approved by institutional leadership ✓ Findings presented at institutional or national level ✓ Next cohort of champions trained ✓ Institutional CBME policy draft submitted for approval ✓ At least 1 external partnership formalised ✓ Accreditation alignment document drafted | CBME Committee Chair + Institutional Leadership |

**Adaptation guidance:** This timeline assumes a 12-month pilot cycle with dedicated implementation leadership. In settings with very limited protected faculty time, phases may be extended to 18–24 months. The sequence of phases should be maintained — particularly the readiness assessment (Phase 1) and evaluation gate (Phase 4) before scale-up, as skipping these phases is a common cause of implementation failure. Trello (trello.com; free) can be used to track phase activities and assign responsibilities across the committee.

**Key references for phased implementation:** Ferguson et al. (2017) [Reference 26]; Eteng et al. (2024) [Reference 25]; Bhanji et al. (2024) [Reference 30]. For systems readiness assessment tools, see Tip 12 and the WHO Global Competency and Outcomes Framework for UHC (who.int/publications/i/item/9789240034662).
